# Supplementary material for: A competitive electrochemical aptamer-based method for aflatoxin B1 detection with signal-off response
Source: Royal Society of Chemistry journal article supplement (doi:10.1039/c9ay02276g), 2019-12-13
Supplement: c9ay02276g1.pdf [file c9ay02276g1.pdf]

**Electronic Supplementary Material**

**A Competitive Electrochemical Aptamer-Based Method for Aflatoxin B1  
Detection with Signal-off Response**

Chao Wang,<sup>a,b</sup> Yapiao Li,<sup>a,b</sup> Qiang Zhao<sup>\*,a,b</sup>

<sup>a</sup> State Key Laboratory of Environmental Chemistry and Ecotoxicology, Research  
Center for Eco-Environmental Sciences, Chinese Academy of Sciences, Beijing  
100085, China

<sup>b</sup> University of Chinese Academy of Sciences, Beijing 100049, China

\*Corresponding author

E-mail: qiangzhao@rcees.ac.cn.

Tel: + 86-10-62849892. Fax: + 86-10-62849892

### **Pretreatment of the gold electrode**

Firstly, a gold electrode (2 mm in diameter) was polished to a mirror-like surface by using 0.05  $\mu\text{m}$  alumina slurries on a microcloth, and then rinsed by ultrasonication in water and ethanol, respectively. Next, the electrode was electrochemically cleaned in 0.5 M  $\text{H}_2\text{SO}_4$  aqueous solution by an oxidation step (2 V for 5 s) and then a reduction step (-0.35 V for 10 s). After that, cyclic voltammetry (CV) in the range of -0.35 V to 1.55 V was conducted (20 scans at a scan rate of 4 V/s, followed by 10 scans at a scan rate of 0.1 V/s). Then, a second electrochemical cleaning was performed in 0.1 M  $\text{H}_2\text{SO}_4$  aqueous solution containing 0.01 M potassium chloride, to further clean the gold electrode surface. In details, a set of CV scans were conducted in four different potential ranges: (a) 0.2 to 0.75 V; (b) 0.2 to 1.0 V; (c) 0.2 to 1.25 V; (d) 0.2 to 1.5 V. Ten segments for each potential range, at a scan rate of 0.1 V/s. Finally, the gold electrode was rinsed with deionized water and blow-dried by nitrogen, and it was ready for DNA modification.

**Table S1** CV characterization of different modified electrodes

| Electrodes  | Oxidation peak  |             | Reduction peak  |             |
|-------------|-----------------|-------------|-----------------|-------------|
|             | Potential       | $i_p$ value | Potential       | $i_p$ value |
|             | (V vs. Ag/AgCl) | ( $\mu$ A)  | (V vs. Ag/AgCl) | ( $\mu$ A)  |
| Au          | 0.27            | 23.03       | 0.16            | -21.21      |
| cDNA/Au     | 0.35            | 6.77        | 0.05            | -4.15       |
| MCH/cDNA/Au | 0.38            | 5.81        | -0.02           | -2.59       |

**Table S2** Comparison of some aptamer-based assays for AFB1

| Detection method          | Strategy                                                                                                                 | Dynamic range       | LOD     | Ref.      |
|---------------------------|--------------------------------------------------------------------------------------------------------------------------|---------------------|---------|-----------|
| Colorimetry               | Relying on assembly of an aptamer and two split DNAzyme halves                                                           | 0.3 nM-31.2 $\mu$ M | 0.3 nM  | [23]      |
| Fluorescence              | Fluorescence resonance energy transfer (FRET) quenching of fluorescence of CdTe quantum dots by AuNPs                    | 10-400 nM           | 3.4 nM  | [24]      |
| Fluorescence              | Using a fluorophore-labeled aptamer and its cDNA sequence that is labeled with a quencher                                | 16-312 nM           | 5 nM    | [25]      |
| Fluorescence              | A dipstick assay based on a competitive reaction of the biotin-modified aptamer between AFB1 and Cy5-modified DNA probes | 1-31 nM             | 1 nM    | [26]      |
| Fluorescence              | Based on quenching of the fluorescence of CdTe quantum dots by graphene oxide (GO)                                       | 1.6 nM-160 $\mu$ M  | 1.4 nM  | [27]      |
| Electrochemistry          | Using cystamine-poly (amidoamine) dendrimers layers as platform for immobilization of aptamer                            | 0.4-10 nM           | 0.4 nM  | [18]      |
| Electrochemistry          | Aptamers modified screen-printed carbon electrode (SPCE)                                                                 | 0.4-50 nM           | 0.4 nM  | [28]      |
| Electrochemistry          | Using MB-tagged aptamer on a SPCE modified with functionalized graphene oxide                                            | 0.2-19 nM           | 0.16 nM | [29]      |
| Electrochemistry          | Electrochemical enzyme-linked oligonucleotide array                                                                      | 0.32-32 nM          | 0.28 nM | [30]      |
| Electrochemistry          | Based on competition between MB-labeled aptamer and complementary DNA modified on gold electrode                         | 2-500 nM            | 2 nM    | This work |
| Surface plasmon resonance | Aptamer surface plasmon resonance sensor                                                                                 | 0.4-200 nM          | 0.4 nM  | [22]      |

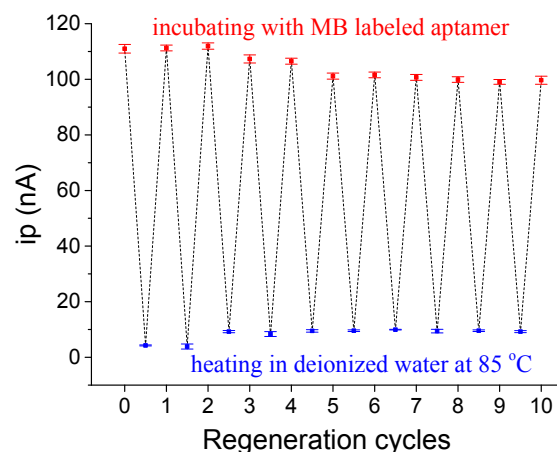

**Fig. S1.** Effects of regeneration cycles on  $i_p$  values of this electrochemical sensor. Experimental conditions: 50 nM MB-labeled aptamer, 20 mM  $MgCl_2$  in binding buffer, and incubation for 5 min at 4 °C. The MB-labeled aptamer/MCH/cDNA/Au electrode was regenerated to MCH/cDNA/Au electrode by incubation in deionized water at 85°C for 1 min.

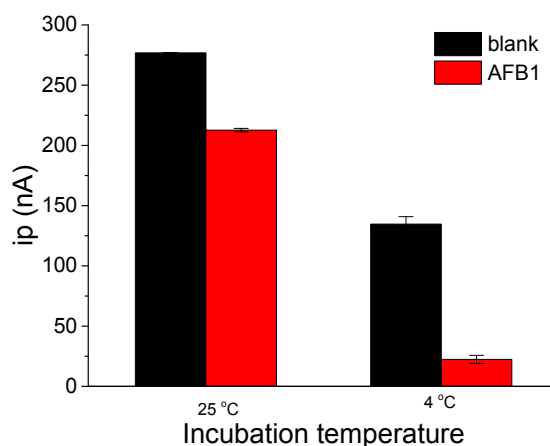

**Fig. S2** Effect of incubation temperature on  $i_p$  value in the absence of or in the presence of AFB1 (200 nM). Experimental condition: 50 nM MB-labeled aptamer, binding buffer containing 20 mM  $MgCl_2$ , and incubation for 5 min.

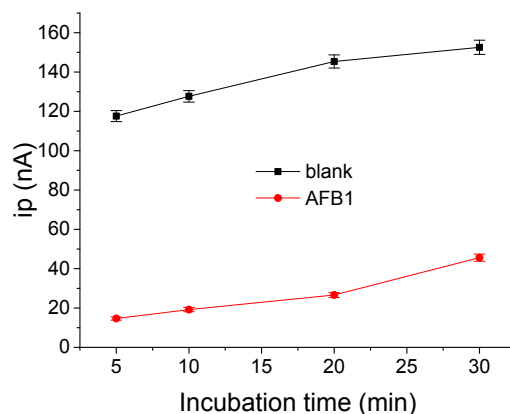

**Fig. S3** Effect of incubation time on  $i_p$  values in the absence of or in the presence of AFB1 ( 200 nM). Experimental condition: 50 nM MB-labeled aptamer, binding buffer containing 20 mM  $MgCl_2$ , and incubation at 4 °C.

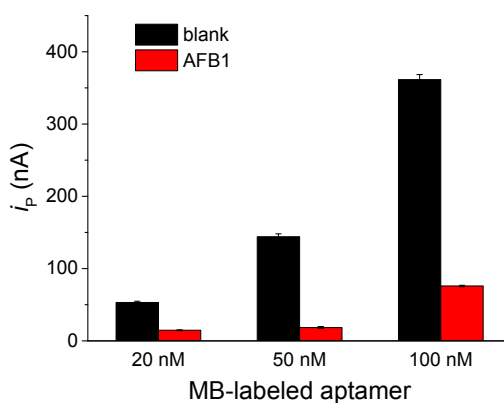

**Fig. S4** Effect of concentration of MB-labeled aptamer in sample solution on  $i_p$  values in the absence of or in the presence of AFB1 ( 200 nM). Binding buffer containing 20 mM  $MgCl_2$  and incubation for 5 min at 4 °C were applied.

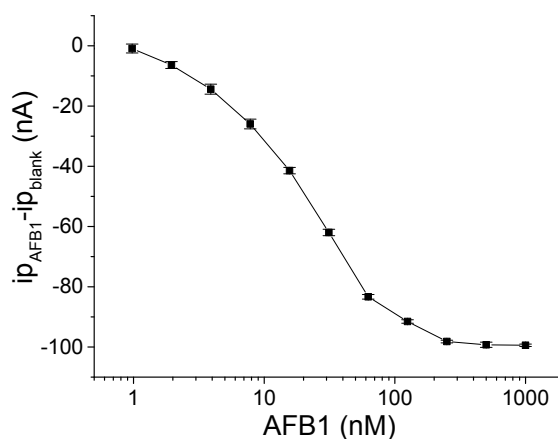

**Fig. S5.** Detection of AFB1 spiked in 50-fold diluted white grape wine.
